# Supplementary material for: A colorimetric nitrite detection system with excellent selectivity and high sensitivity based on Ag@Au nanoparticles
Source: Royal Society of Chemistry journal article supplement (doi:10.1039/c4an01583e), 2014-12-15
Supplement: c4an01583e1.pdf [file c4an01583e1.pdf]

## Supporting Information

### **A colorimetric nitrite detection system based on Ag@Au nanoparticles with excellent selectivity and high sensitivity**

Tianhua Li<sup>a,b,1</sup>, Yonglong Li<sup>a,c,1</sup>, Yujie Zhang<sup>a</sup>, Chen Dong<sup>a</sup>, Zheyu Shen<sup>a,\*</sup>, Aiguo Wu<sup>a,\*</sup>

<sup>a</sup>*Key Laboratory of Magnetic Materials and Devices, & Division of Functional Materials and Nano Devices, Ningbo Institute of Materials Technology & Engineering, Chinese Academy of Sciences, Ningbo, Zhejiang, 315201, China.*

<sup>b</sup>*Faculty of Materials Science and Chemical Engineering, Ningbo University, Ningbo 315211, China.*

<sup>c</sup>*Nano Science and Technology Institute, University of Science and Technology of China, Suzhou, Jiangsu, 215123, China.*

\*Corresponding authors

Tel: +86 574 86685039, or +86 574 87617278; Fax: +86 574 86685163

E-mail: aiguo@nimte.ac.cn; or shenzheyu@nimte.ac.cn

<sup>1</sup>These authors contributed equally for this work.

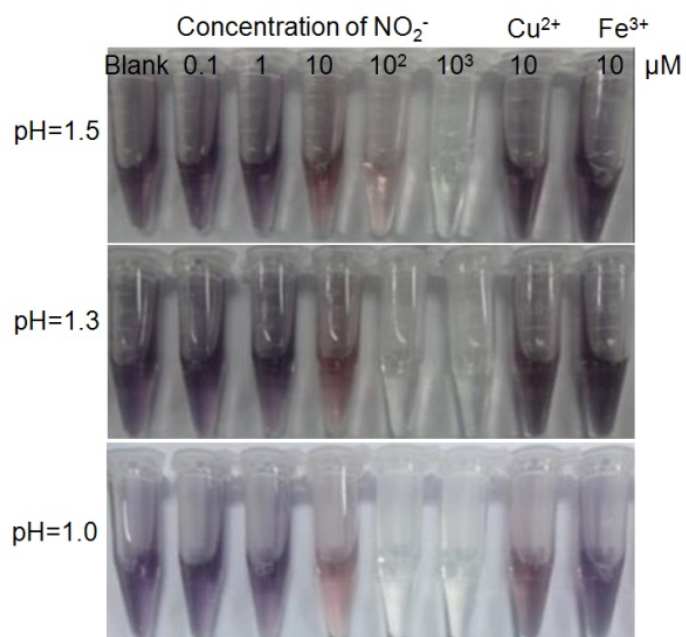

**Figure S1.** Influence of pH value on the color change of the Ag@AuNP dispersions incubated with NO<sub>2</sub><sup>-</sup> (0.1-1000 μM), Fe<sup>3+</sup> (10 μM) or Cu<sup>2+</sup> (10 μM) for 15 min.

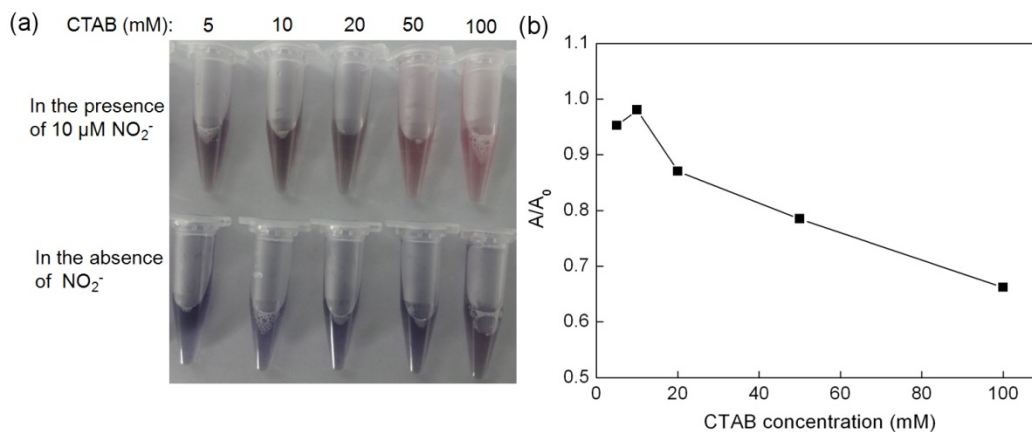

**Figure S2.** (a) Photographic image of the Ag@AuNPs incubated without or with 10 μM of NO<sub>2</sub><sup>-</sup> in the presence of CTAB ranging from 5 to 100 mM. The pH value of the Ag@AuNP dispersions is controlled to be 1.3. (b) Plot of  $A/A_0$  versus the concentration of CTAB.  $A$ : the absorbance value at 526 nm in the UV-vis spectra of Ag@AuNP dispersions incubated with 10 μM of NO<sub>2</sub><sup>-</sup> in the presence of CTAB.  $A_0$ : the absorbance value at 536 nm in the UV-vis spectra of Ag@AuNP dispersions without NO<sub>2</sub><sup>-</sup> incubation in the presence of CTAB.

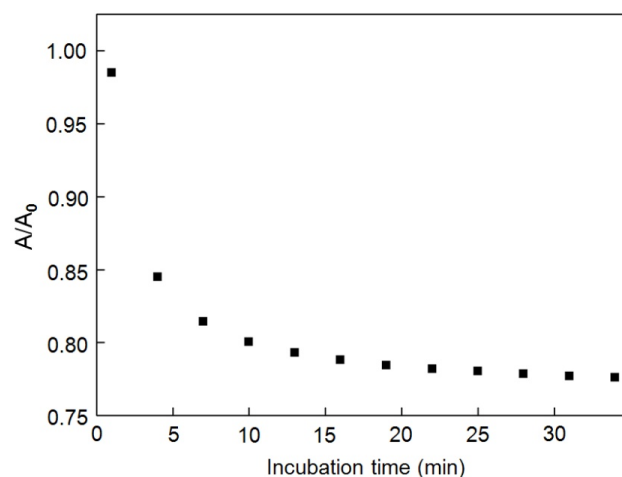

**Figure S3.** Plot of  $A/A_0$  as a function of the incubation time.  $A$ : the absorbance value at 526 nm in the UV-vis spectra of Ag@AuNP dispersions incubated with  $10\ \mu\text{M}$  of  $\text{NO}_2^-$  in the presence of CTAB (100 mM).  $A_0$ : the absorbance value at 536 nm in the UV-vis spectra of Ag@AuNP dispersions without  $\text{NO}_2^-$  incubation in the presence of CTAB (100 mM). The pH value of the Ag@AuNP dispersions is controlled to be 1.3.

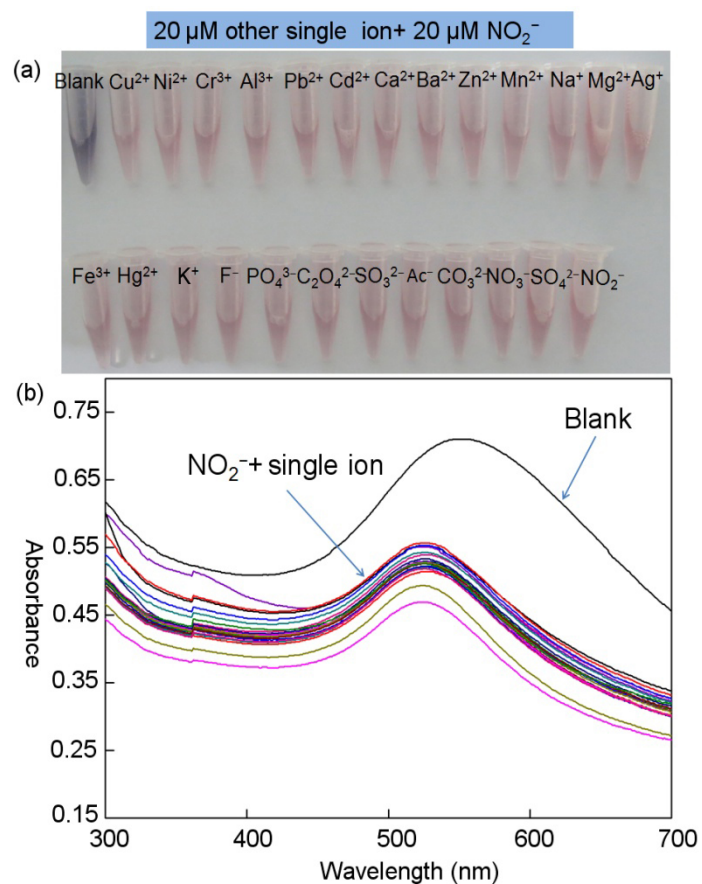

**Figure S4.** Selectivity of the Ag@AuNPs-based detection system for  $\text{NO}_2^-$  compared with other ions. (a): Photograph of the detection systems incubated with 20  $\mu\text{M}$  of  $\text{NO}_2^-$  and 20  $\mu\text{M}$  of other single ion; (b): UV-vis absorption spectra of the detection systems incubated with 20  $\mu\text{M}$  of  $\text{NO}_2^-$  and 20  $\mu\text{M}$  of other single ion. The Ag@AuNPs-based detection system without incubation with  $\text{NO}_2^-$  or any other ions is used as a control.
